# Supplementary material
Source: HighWire-hosted journal article supplement (https://jnnp.bmj.com/content/88/5/402)
Supplement: inline-supplementary-material-5 [file inline-supplementary-material-5.pdf]

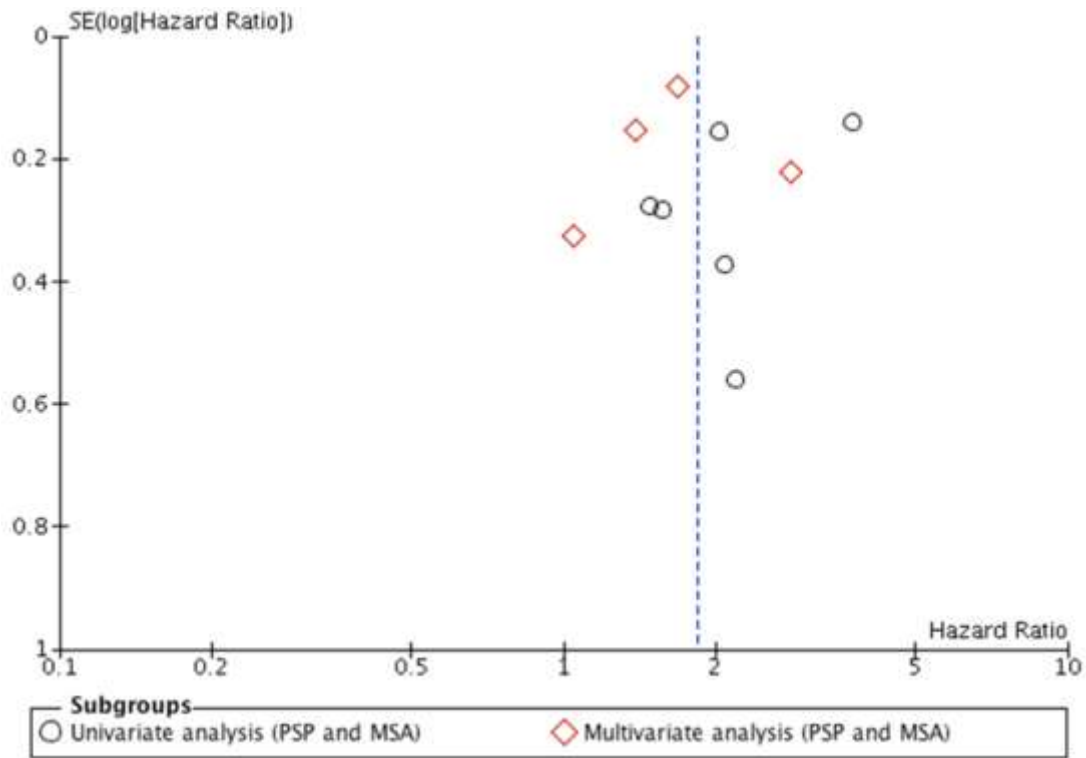

**Supplementary Fig 5.** Funnel plot based on meta-analysis comparing survival of male and female patients
