# Supplementary material
Source: HighWire-hosted journal article supplement (https://jnnp.bmj.com/content/88/5/402)
Supplement: inline-supplementary-material-10 [file inline-supplementary-material-10.pdf]

| Condition  | Symptom                 | Percentage of patients with symptom in clinical/post-mortem studies | Number of studies clinical/post-mortem | P-value |
|------------|-------------------------|---------------------------------------------------------------------|----------------------------------------|---------|
| <b>MSA</b> | Motor                   | 83%/82%                                                             | 8/2                                    | 0.54    |
|            | Autonomic               | 89%/84%                                                             | 7/2                                    | 0.0029  |
|            | Cerebellar              | 56%/63%                                                             | 8/2                                    | 0.0064  |
|            | MSA-P phenotype         | 55%/52%                                                             | 12/3                                   | 0.99    |
| <b>PSP</b> | Falls                   | 91%/87%                                                             | 4/2                                    | 0.19    |
|            | Supranuclear gaze palsy | 97%/77%                                                             | 4/2                                    | <0.0001 |
|            | PSP-RS phenotype        | 67%/44%                                                             | 3/2                                    | <0.0001 |

**Supplementary table 4.** Comparison of symptom profile between patients in clinical and post-mortem studies. Statistical significance testing was undertaken using the Chi-squared test. The quality of these data is limited by the variation in symptom definition across studies and the small number of studies reporting symptom profile in the appropriate format.
